## CORRECTION

# Structural characterization of amorphous calcium carbonate-binding protein: an insight into the mechanism of amorphous calcium carbonate formation

J. SU, X. LIANG, Q. ZHOU, G. ZHANG, H. WANG, L. XIE and R. ZHANG

Volume 453 (2013), pp. 179–186

The incorrect PDB code was associated with the pentameric  $\alpha$ -7 nicotinic receptor in the section ‘The  $\text{Ca}^{2+}$ -binding sites of ACCBP are arranged with a 5-fold symmetry, which is essential

for ACC formation’ (page 184). The correct PDB code is 3SQ6. This error occurs in the print journal; the online version is not affected.
